# Supplementary material for: Combination of structure-based virtual screening, molecular docking and molecular dynamics approaches for the discovery of anti-prion fibril flavonoids
Source: Front Mol Biosci. 2023 Jan 5;9:1088733. doi: 10.3389/fmolb.2022.1088733 (PMC9849400; doi:10.3389/fmolb.2022.1088733)
Supplement: Supplementary file 1 [file DataSheet1.docx]

Supplementary Material

Table S1 A list of 100 quercetin-like molecules with high docking score.

| 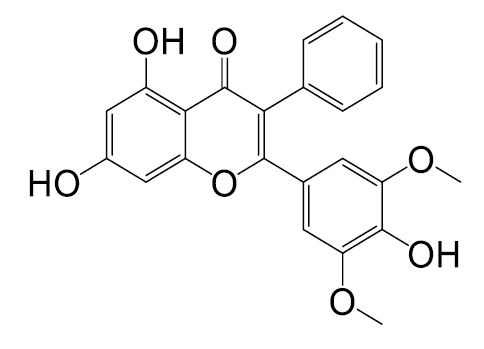  5,7-dihydroxy-2-(4-hydroxy-3,5-dimethoxyphenyl)-3-phenylchromen-4-one  C23H18O7  PubChem: 66779341 | 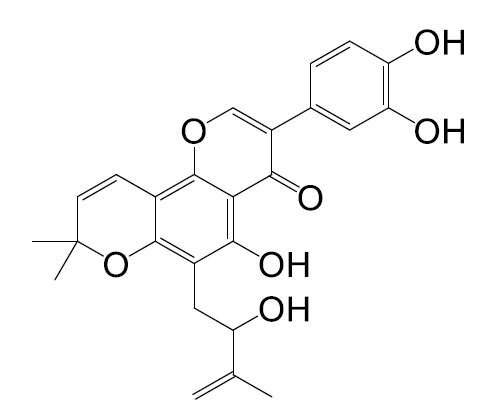  3-(3,4-dihydroxyphenyl)-5-hydroxy-6-(2-hydroxy-3-methyl-3-butenyl)-8,8-dimethyl-4H,8H-benzo[1,2-b:3,4-b']dipyran-4-one  C25H24O7  101676241 | 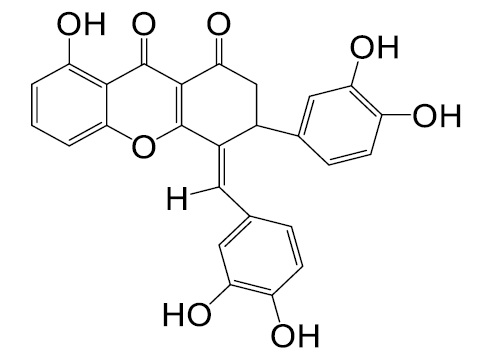  (4*E*)-3-(3,4-dihydroxyphenyl)-4-[(3,4-dihydroxyphenyl)methylidene]-8-hydroxy-2,3-dihydroxanthene-1,9-dione  C26H18O8  102144697 | 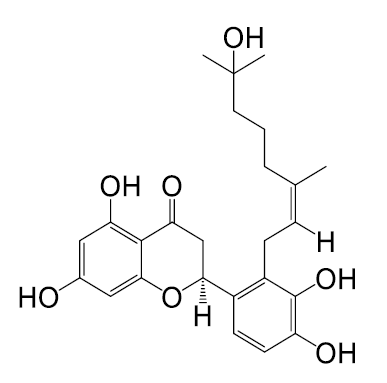  (2S)-2-[3,4-dihydroxy-2-[(Z)-7-hydroxy-3,7-dimethyloct-2-enyl]phenyl]-5,7-dihydroxy-2,3-dihydrochromen-4-one  C25H30O7  10411087 | 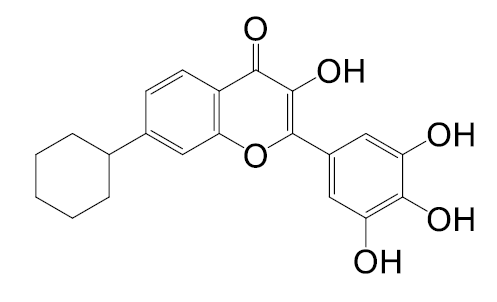  7-cyclohexyl-3-hydroxy-2-(3,4,5-trihydroxyphenyl)chromen-4-one  C21H20O6  56963466 | 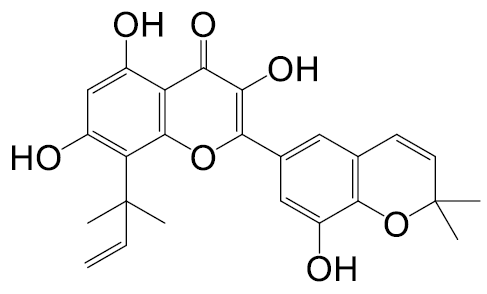  3,5,7-trihydroxy-2-(8-hydroxy-2,2-dimethylchromen-6-yl)-8-(2-methylbut-3-en-2-yl)chromen-4-one  C25H24O7  10342975 |
| --- | --- | --- | --- | --- | --- |
| 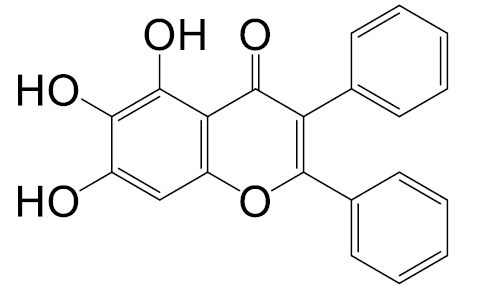  5,6,7-trihydroxy-2,3-diphenylchromen-4-one  C21H14O5  1024700 | 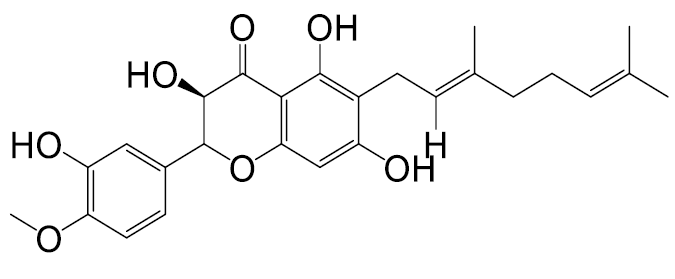  (3*R*)-6-[(2*E*)-3,7-dimethylocta-2,6-dienyl]-3,5,7-trihydroxy-2-(3-hydroxy-4-methoxyphenyl)-2,3-dihydrochromen-4-one  C26H30O7  122527114 | 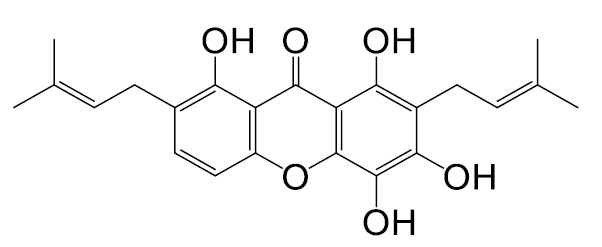  1,3,4,8-tetrahydroxy-2,7-bis(3-methylbut-2-enyl)xanthen-9-one  C23H24O6  118349804 | 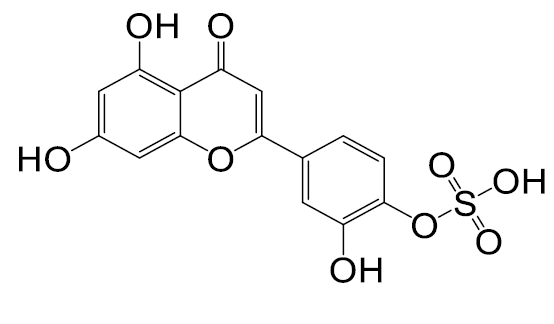  [4-(5,7-dihydroxy-4-oxochromen-2-yl)-2-hydroxyphenyl] hydrogen sulfate  C15H10O9S  44258152 | 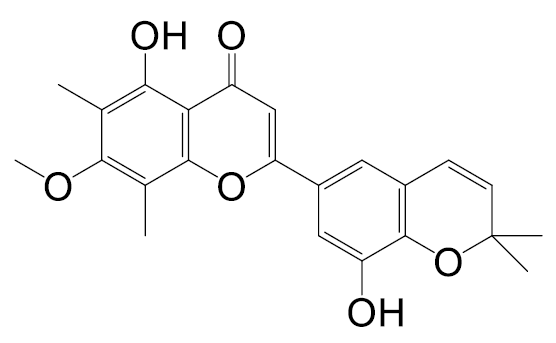  5-hydroxy-2-(8-hydroxy-2,2-dimethylchromen-6-yl)-7-methoxy-6,8-dimethylchromen-4-one  C23H22O6  44258380 | 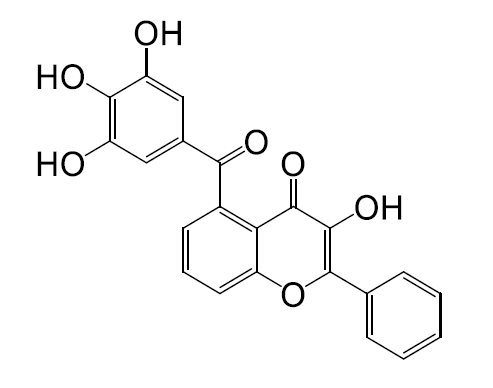  3-hydroxy-2-phenyl-5-(3,4,5-trihydroxybenzoyl)chromen-4-one  C22H14O7  12970394 |

Table S1 (continued) A list of 100 quercetin-like molecules with high docking score.

| 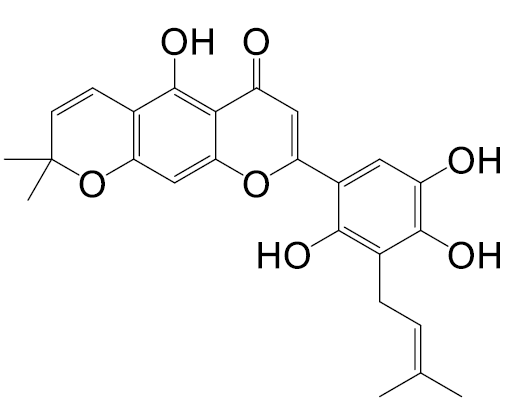  5-hydroxy-2,2-dimethyl-8-[2,4,5-trihydroxy-3-(3-methylbut-2-enyl)phenyl]pyrano[3,2-g]chromen-6-one  C25H24O7  14259062 | 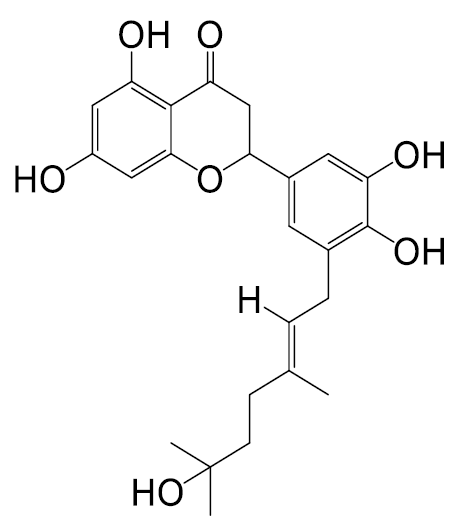  2-[3,4-dihydroxy-5-[(E)-6-hydroxy-3,6-dimethylhept-2-enyl]phenyl]-5,7-dihydroxy-2,3-dihydrochromen-4-one  C24H28O7  22297676 | 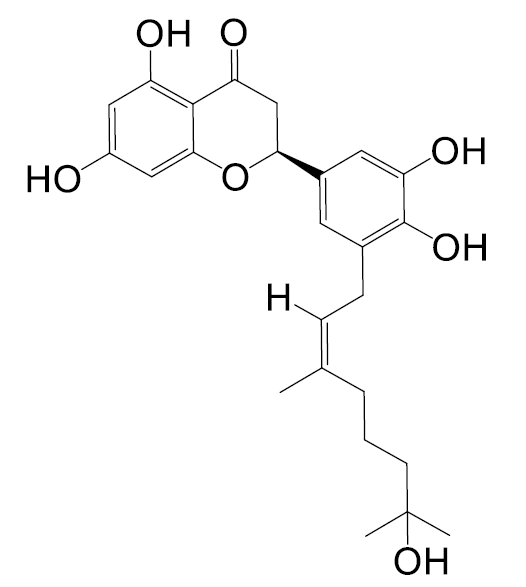  (2*S*)-2-[3,4-dihydroxy-5-[(*Z*)-7-hydroxy-3,7-dimethyloct-2-enyl]phenyl]-5,7-dihydroxy-2,3-dihydrochromen-4-one  C25H30O7  24751435 | 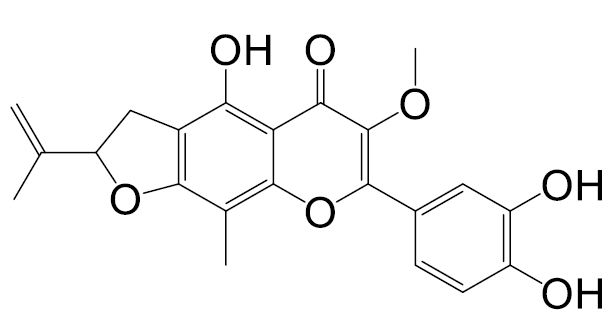  8-C-Methylvelloquercetin 3-methyl ether  C22H20O7  44259675 | 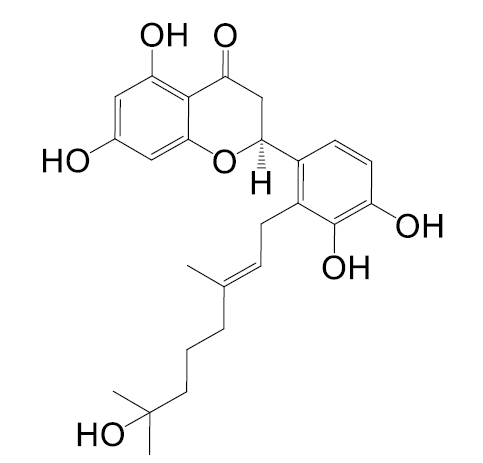  (2*S*)-2-[3,4-dihydroxy-2-(7-hydroxy-3,7-dimethyloct-2-enyl)phenyl]-5,7-dihydroxy-2,3-dihydrochromen-4-one  C25H30O7  90815392 | 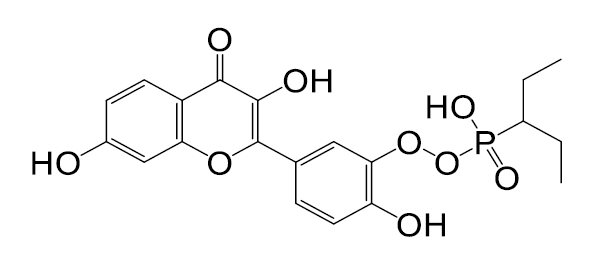  [5-(3,7-dihydroxy-4-oxochromen-2-yl)-2-hydroxyphenyl]peroxy-pentan-3-ylphosphinic acid  C20H21O9P  91473052 |
| --- | --- | --- | --- | --- | --- |
| 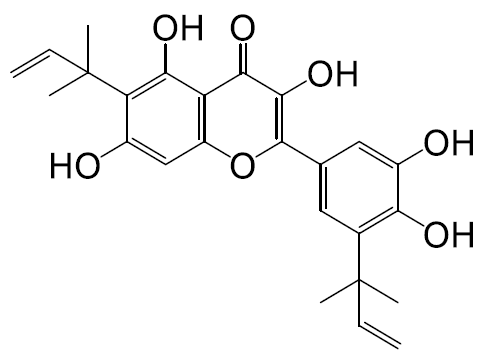  2-[3,4-dihydroxy-5-(2-methylbut-3-en-2-yl)phenyl]-3,5,7-trihydroxy-6-(2-methylbut-3-en-2-yl)chromen-4-one  C25H26O7  91249671 | 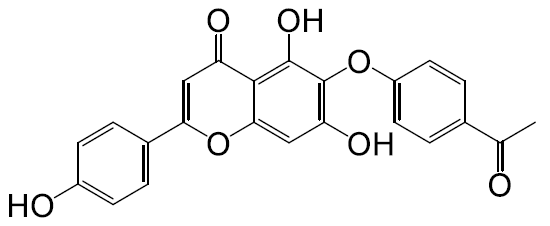  6-(4-acetylphenoxy)-5,7-dihydroxy-2-(4-hydroxyphenyl)chromen-4-one  C23H16O7  91427882 | 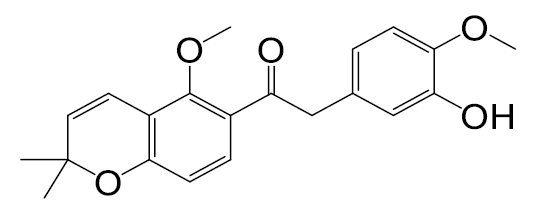  2-(3-hydroxy-4-methoxyphenyl)-1-(5-methoxy-2,2-dimethylchromen-6-yl)ethanone  C21H22O5  122700651 | 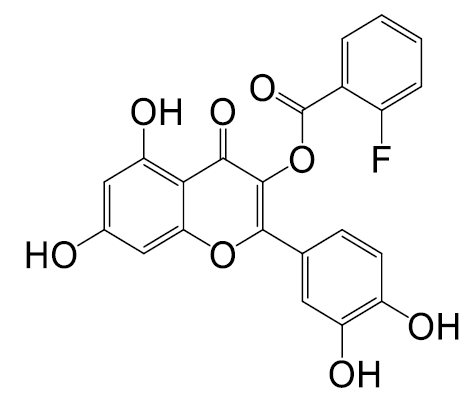  [2-(3,4-dihydroxyphenyl)-5,7-dihydroxy-4-oxochromen-3-yl] 2-fluorobenzoate  C22H13FO8  129904923 | 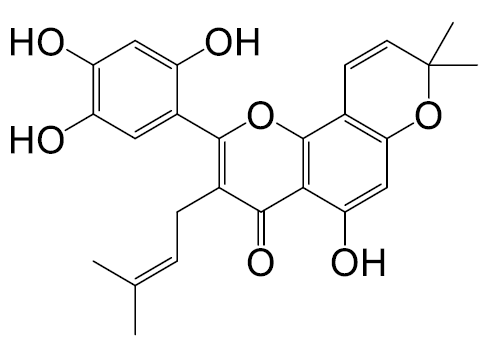  5-hydroxy-8,8-dimethyl-3-(3-methylbut-2-enyl)-2-(2,4,5-trihydroxyphenyl)pyrano[2,3-h]chromen-4-one  C25H24O7  5481962 | 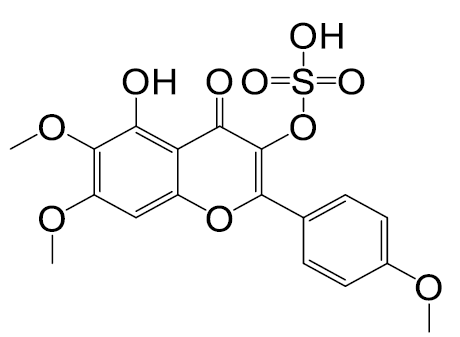  [5-hydroxy-6,7-dimethoxy-2-(4-methoxyphenyl)-4-oxochromen-3-yl] hydrogen sulfate  C18H16O10S  14630674 |

Table S1 (continued) A list of 100 quercetin-like molecules with high docking score.

| 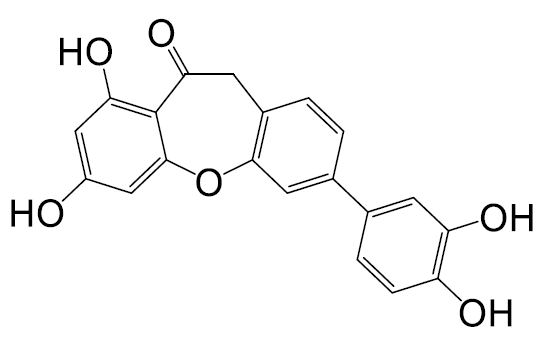  9-(3,4-dihydroxyphenyl)-2,4-dihydroxy-6*H*-benzo[b][1]benzoxepin-5-one  C20H14O6  20631753 | 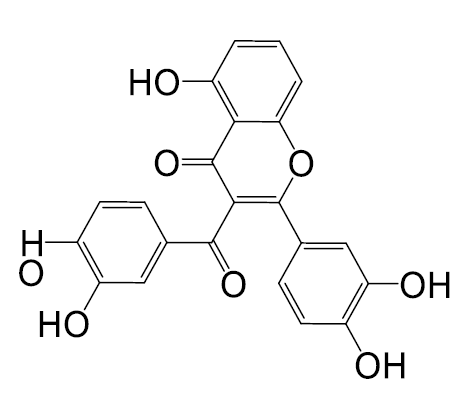  3-(3,4-dihydroxybenzoyl)-2-(3,4-dihydroxyphenyl)-5-hydroxychromen-4-one  C22H14O8  23631500 | 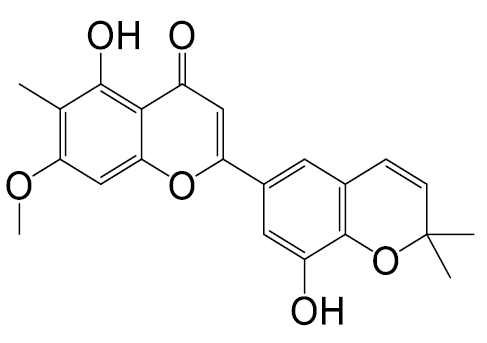  5-hydroxy-2-(8-hydroxy-2,2-dimethylchromen-6-yl)-7-methoxy-6-methylchromen-4-one  C22H20O6  44258379 | 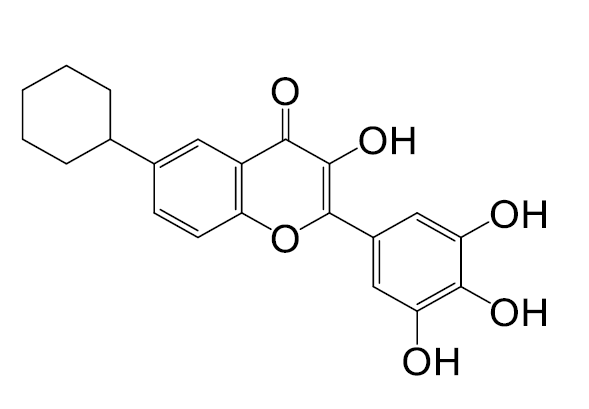  6-cyclohexyl-3-hydroxy-2-(3,4,5-trihydroxyphenyl)chromen-4-one  C21H20O6  56963465 | 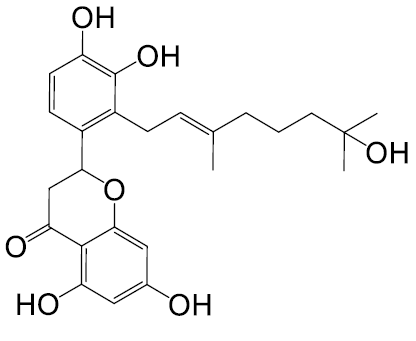  2-[3,4-dihydroxy-2-(7-hydroxy-3,7-dimethyloct-2-enyl)phenyl]-5,7-dihydroxy-2,3-dihydrochromen-4-one  C25H30O7  66839900 | 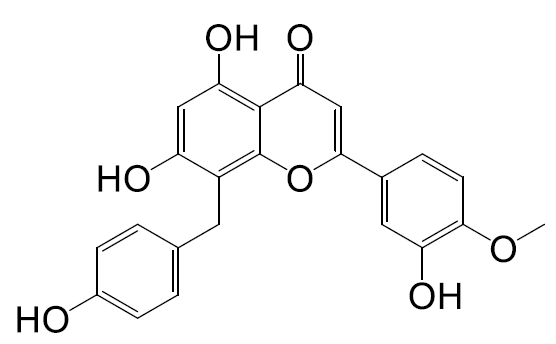  5,7-dihydroxy-2-(3-hydroxy-4-methoxyphenyl)-8-[(4-hydroxyphenyl)methyl]chromen-4-one  C23H18O7  101916307 |
| --- | --- | --- | --- | --- | --- |
| 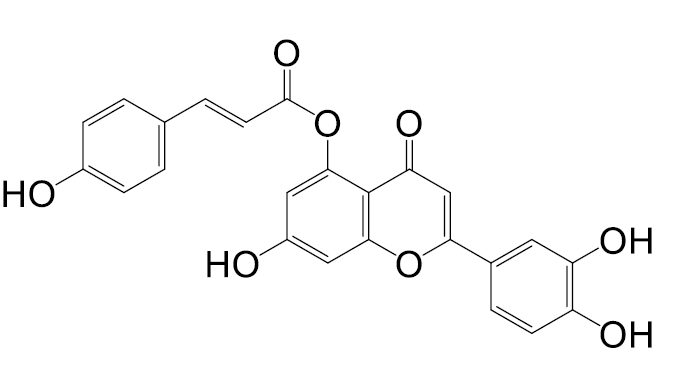  [2-(3,4-dihydroxyphenyl)-7-hydroxy-4-oxochromen-5-yl] 3-(4-hydroxyphenyl)prop-2-enoate  C24H16O8  123616566 | 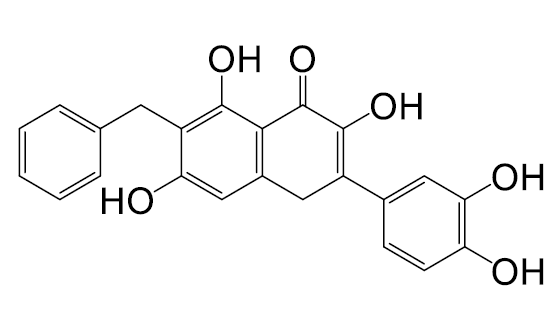  6-benzyl-2-(3,4-dihydroxyphenyl)-3,5,7-trihydroxychromen-4-one  C22H16O7  129760288 | 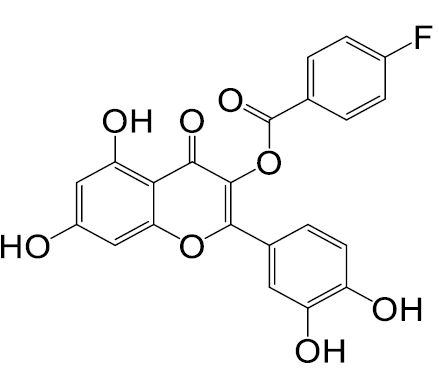  [2-(3,4-dihydroxyphenyl)-5,7-dihydroxy-4-oxochromen-3-yl] 4-fluorobenzoate  C22H13FO8  129904893 | 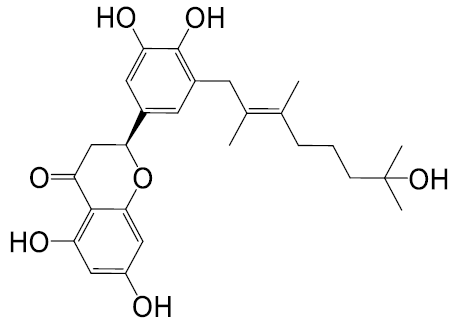  (2S)-2-[3,4-dihydroxy-5-[(E)-7-hydroxy-3,7-dimethyloct-2-enyl]phenyl]-5,7-dihydroxy-2,3-dihydrochromen-4-one  C25H30O7  637252 | 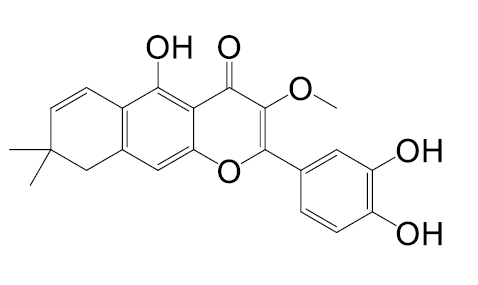  8-(3,4-dihydroxyphenyl)-5-hydroxy-7-methoxy-2,2-dimethylpyrano[3,2-g]chromen-6-one  C21H18O7  9977173 | 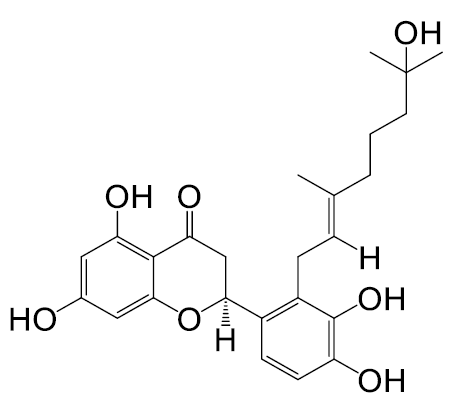  (2*S*)-2-[3,4-dihydroxy-2-[(*E*)-7-hydroxy-3,7-dimethyloct-2-enyl]phenyl]-5,7-dihydroxy-2,3-dihydrochromen-4-one  C25H30O7  10950300 |

Table S1 (continued) A list of 100 quercetin-like molecules with high docking score.

| 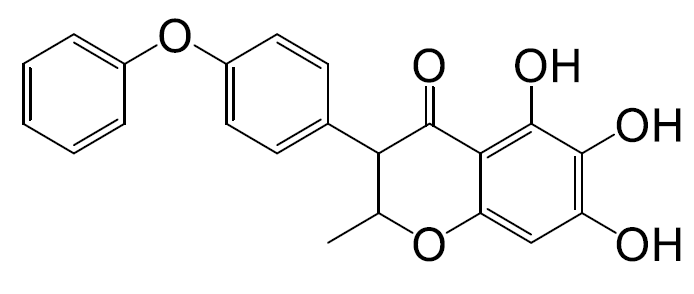  5,6,7-trihydroxy-2-methyl-3-(4-phenoxyphenyl)chromen-4-one  C22H16O6  58749545 | 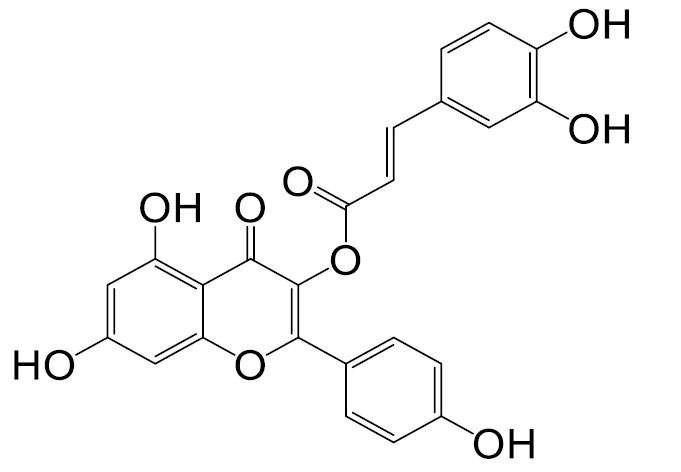  [5,7-dihydroxy-2-(4-hydroxyphenyl)-4-oxochromen-3-yl] 3-(3,4-dihydroxyphenyl)prop-2-enoate  C24H16O9  69307307 | 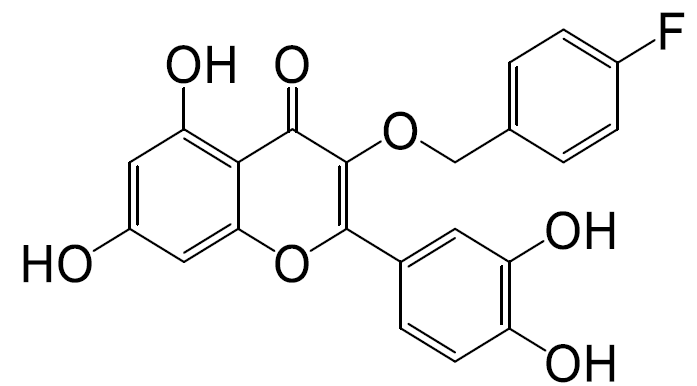  2-(3,4-dihydroxyphenyl)-3-[(4-fluorophenyl)methoxy]-5,7-dihydroxychromen-4-one  C22H15FO7  90643984 | 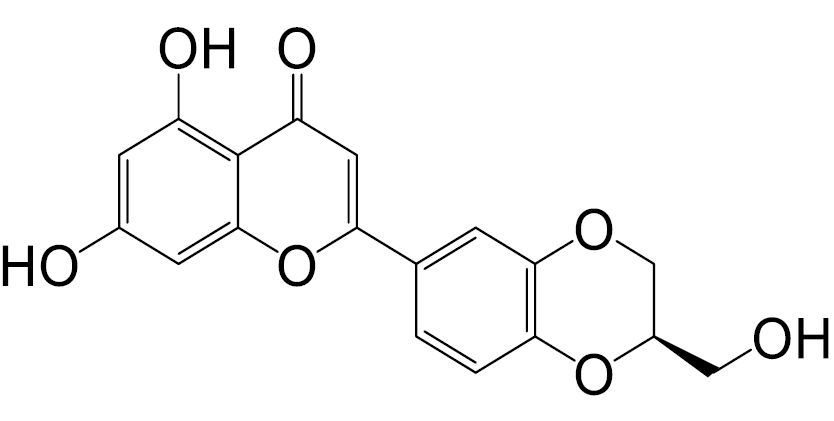  5,7-dihydroxy-2-[(2R)-2-(hydroxymethyl)-2,3-dihydro-1,4-benzodioxin-6-yl]chromen-4-one  C18H14O7  101064811 | 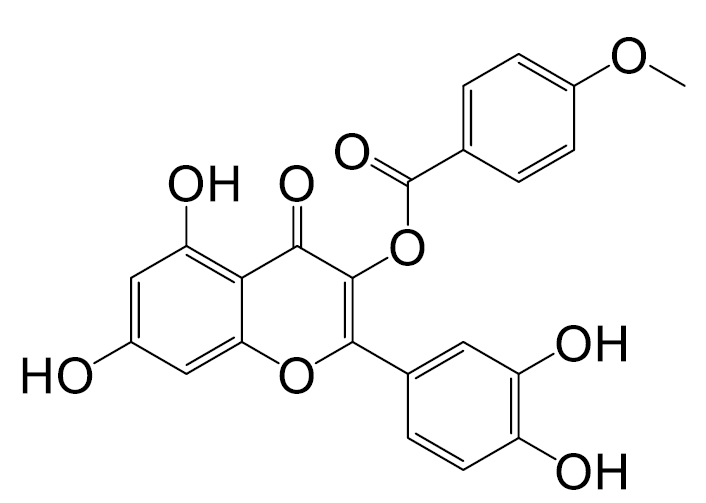  [2-(3,4-dihydroxyphenyl)-5,7-dihydroxy-4-oxochromen-3-yl] 4-methoxybenzoate  C23H16O9  129904993 | 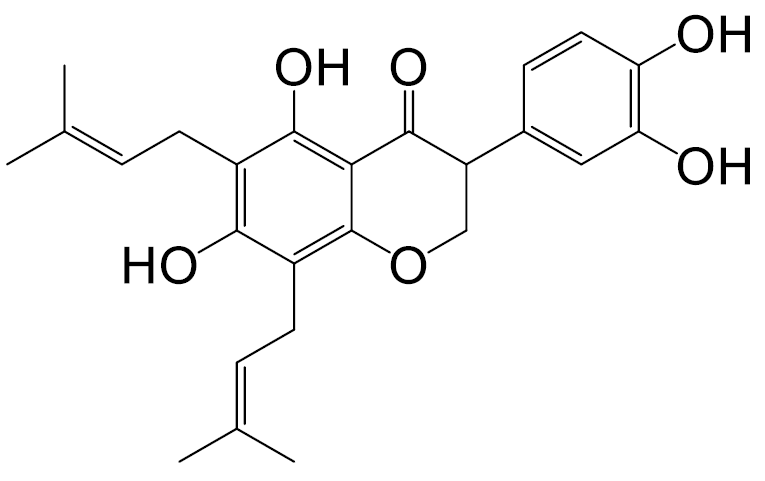  3-(3,4-dihydroxyphenyl)-5,7-dihydroxy-6,8-bis(3-methylbut-2-enyl)-2,3-dihydrochromen-4-one  C25H28O6  487089 |
| --- | --- | --- | --- | --- | --- |
| 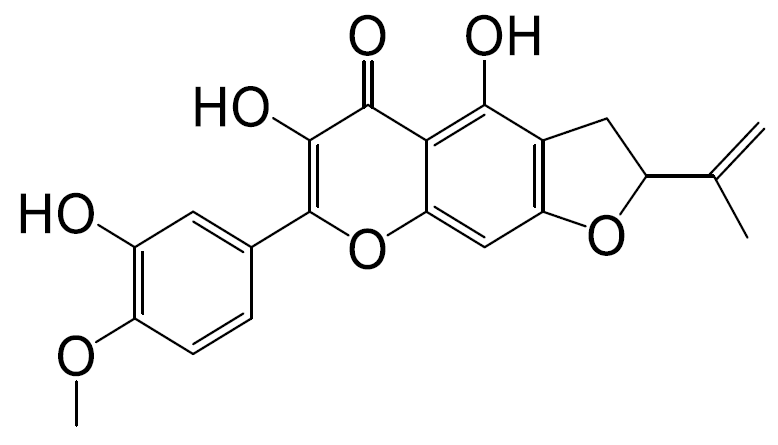  4,6-dihydroxy-7-(3-hydroxy-4-methoxyphenyl)-2-prop-1-en-2-yl-2,3-dihydrofuro[3,2-g]chromen-5-one  C21H18O7  15126638 | 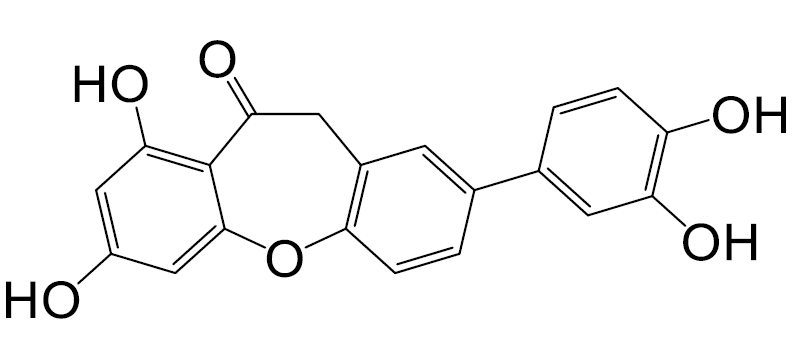  3-(3,4-dihydroxyphenyl)-7,9-dihydroxy-5*H*-benzo[b][1]benzoxepin-6-one  C20H14O6  20631775 | 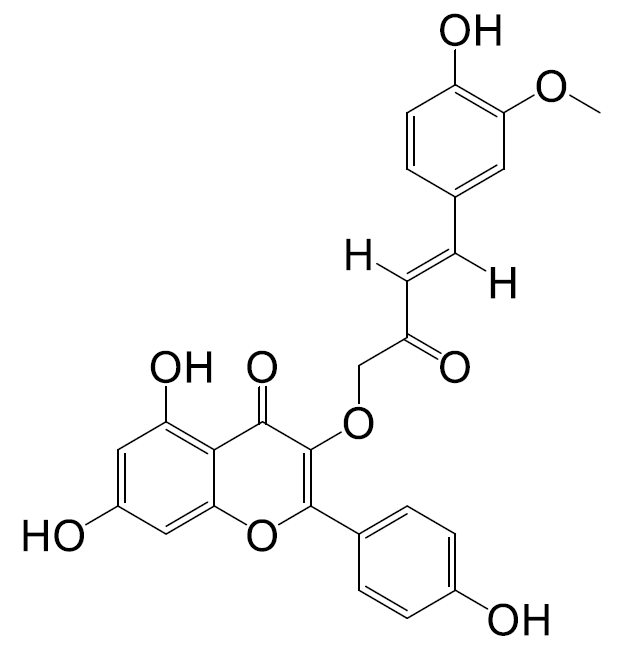  5,7-dihydroxy-3-[(*E*)-4-(4-hydroxy-3-methoxyphenyl)-2-oxobut-3-enoxy]-2-(4-hydroxyphenyl)chromen-4-one  C26H20O9  56641636 | 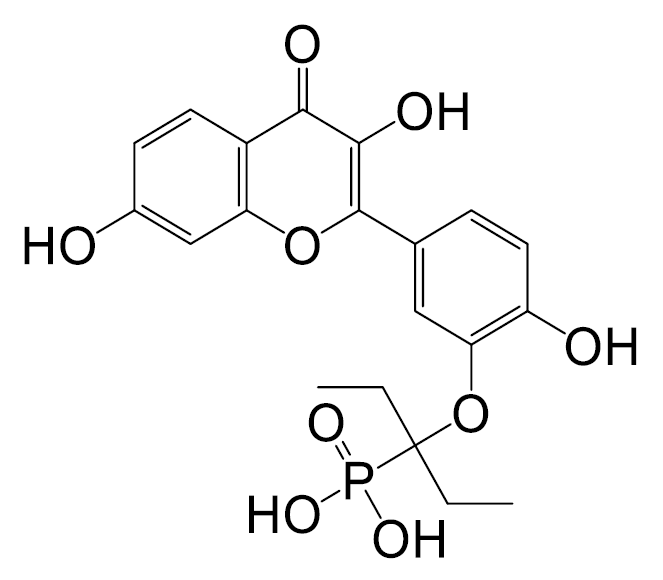  3-[5-(3,7-dihydroxy-4-oxochromen-2-yl)-2-hydroxyphenoxy]pentan-3-ylphosphonic acid  C20H21O9P66600462 | 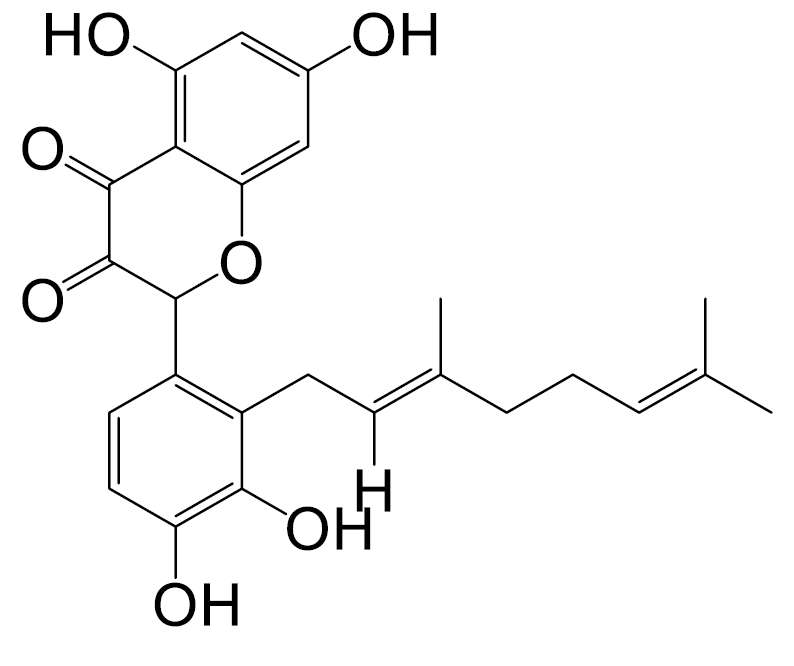  2-[2-[(2*E*)-3,7-dimethylocta-2,6-dienyl]-3,4-dihydroxyphenyl]-5,7-dihydroxychromene-3,4-dione  C25H26O7  71765672 | 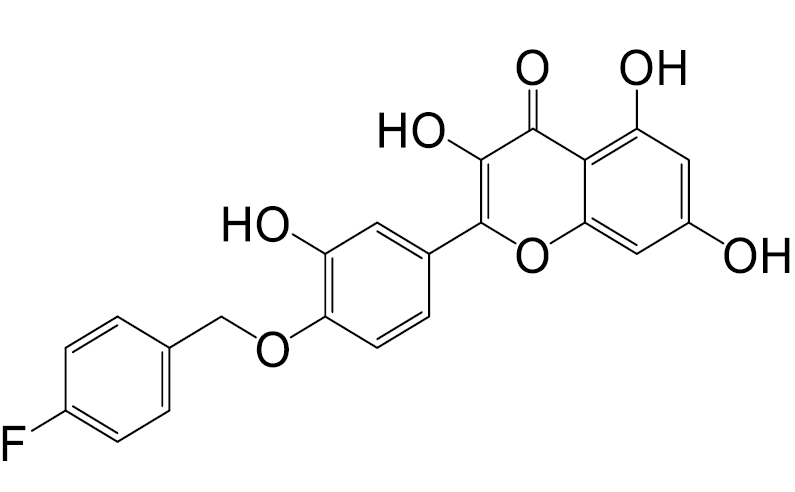  2-[4-[(4-fluorophenyl)methoxy]-3-hydroxyphenyl]-3,5,7-trihydroxychromen-4-one  C22H15FO7  90643987 |

Table S1 (continued) A list of 100 quercetin-like molecules with high docking score.

| 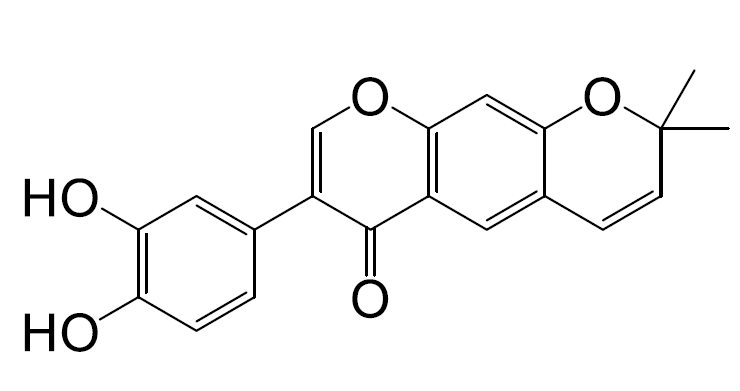  7-(3,4-dihydroxyphenyl)-2,2-dimethylpyrano[3,2-g]chromen-6-one  C20H16O5  101405688 | 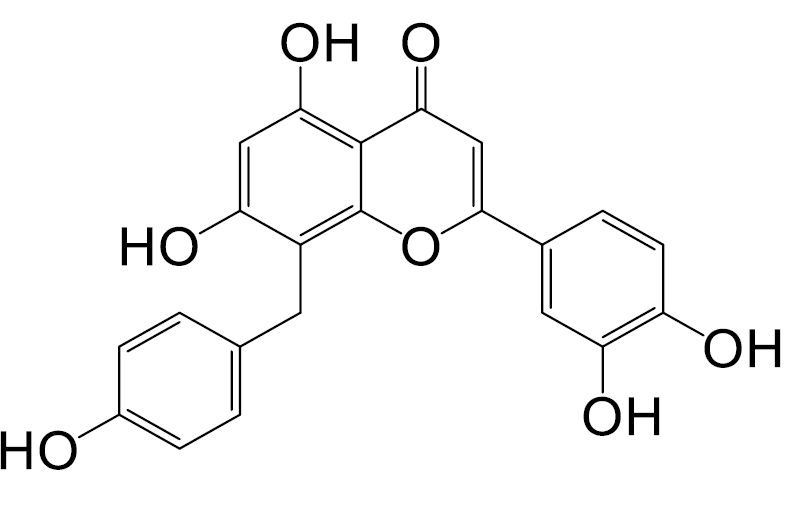  2-(3,4-dihydroxyphenyl)-5,7-dihydroxy-8-[(4-hydroxyphenyl)methyl]chromen-4-one  C22H16O7  101916306 | 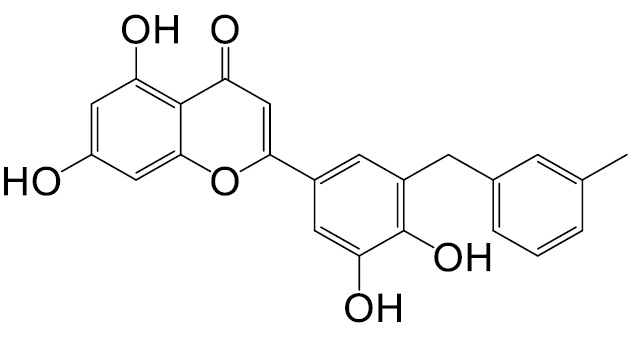  2-[3,4-dihydroxy-5-[(3-methylphenyl)methyl]phenyl]-5,7 dihydroxychromen-4-one  C23H18O6  127045150 | 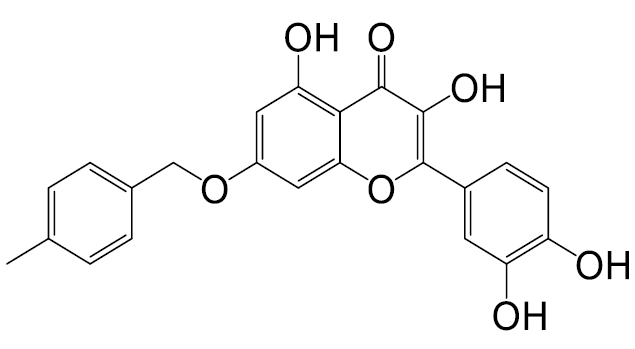  2-(3,4-dihydroxyphenyl)-3,5-dihydroxy-7-[(4-methylphenyl)methoxy]chromen-4-one  C23H18O7  129824763 | 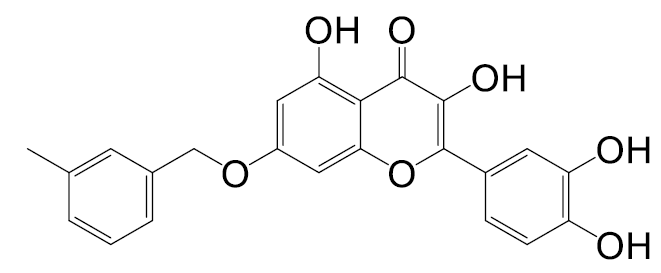  2-(3,4-dihydroxyphenyl)-3,5-dihydroxy-7-[(3-methylphenyl)methoxy]chromen-4-one  C23H18O7  129825792 | 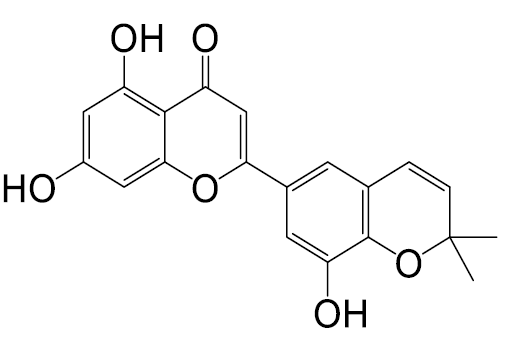  5,7-dihydroxy-2-(8-hydroxy-2,2-dimethylchromen-6-yl)chromen-4-one  C20H16O6  5315397 |
| --- | --- | --- | --- | --- | --- |
| 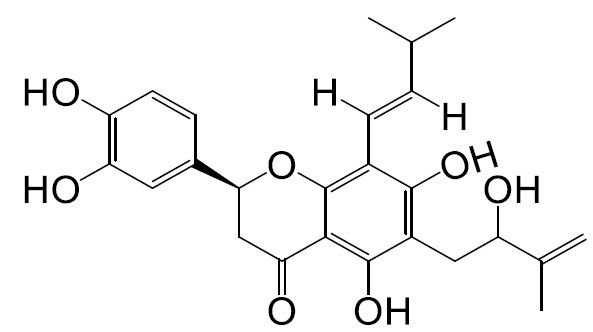  (2S)-2-(3,4-dihydroxyphenyl)-5,7-dihydroxy-6-(2-hydroxy-3-methylbut-3-enyl)-8-[(E)-3-methylbut-1-enyl]-2,3-dihydrochromen-4-one  C25H28O7  10575105 | 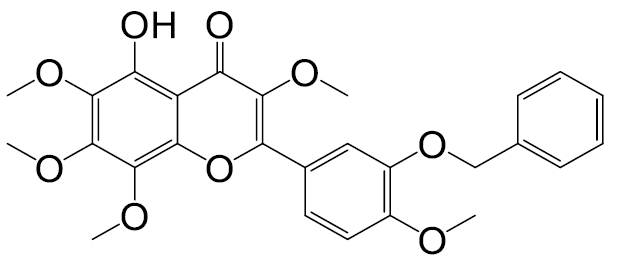  5-hydroxy-3,6,7,8-tetramethoxy-2-(4-methoxy-3-phenylmethoxyphenyl)chromen-4-one  C27H26O9  10577136 | 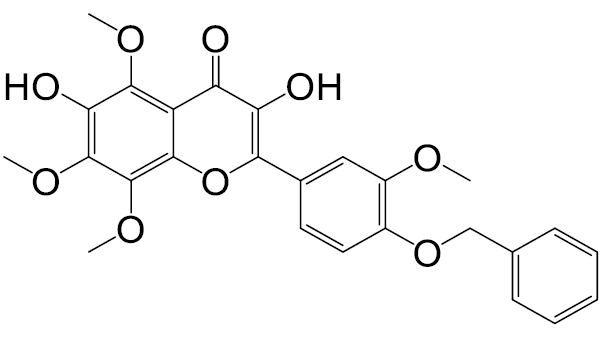  3,6-dihydroxy-5,7,8-trimethoxy-2-(3-methoxy-4-phenylmethoxyphenyl)chromen-4-one  C26H24O9  10648384 | 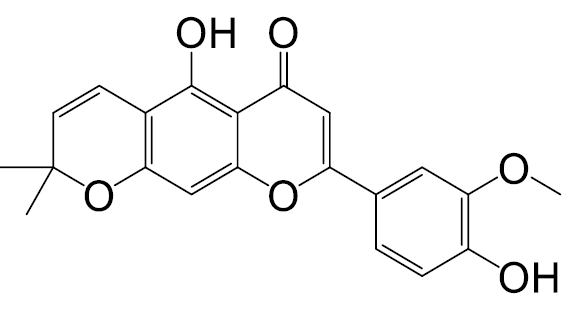  5-hydroxy-8-(4-hydroxy-3-methoxyphenyl)-2,2-dimethylpyrano[3,2-g]chromen-6-one  C21H18O6  10915521 | 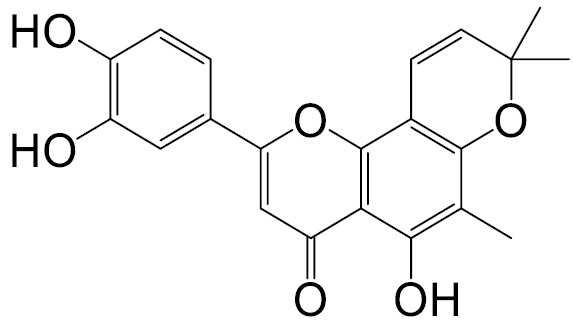  2-(3,4-dihydroxyphenyl)-5-hydroxy-6,8,8-trimethylpyrano[2,3-h]chromen-4-one  C21H18O6  11100628 | 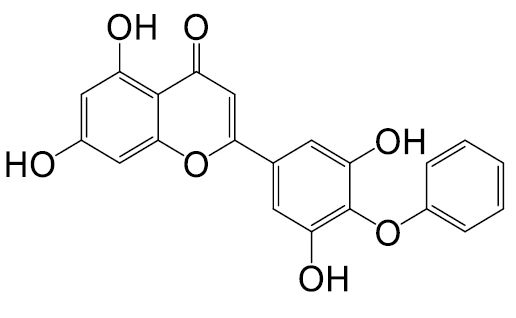  2-(3,5-dihydroxy-4-phenoxyphenyl)-5,7-dihydroxychromen-4-one  C21H14O7  20530145 |

Table S1 (continued) A list of 100 quercetin-like molecules with high docking score.

| 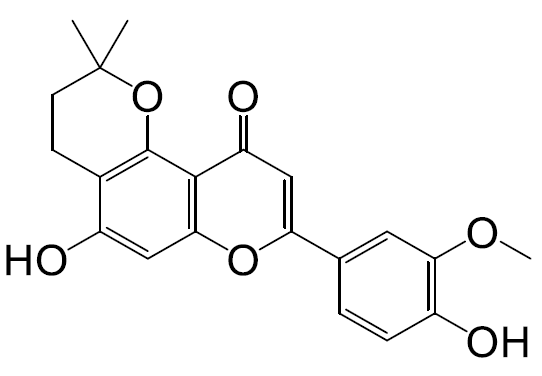  5-hydroxy-8-(4-hydroxy-3-methoxyphenyl)-2,2-dimethyl-3,4-dihydropyrano[2,3-f]chromen-10-one  C21H20O6  44258210 | 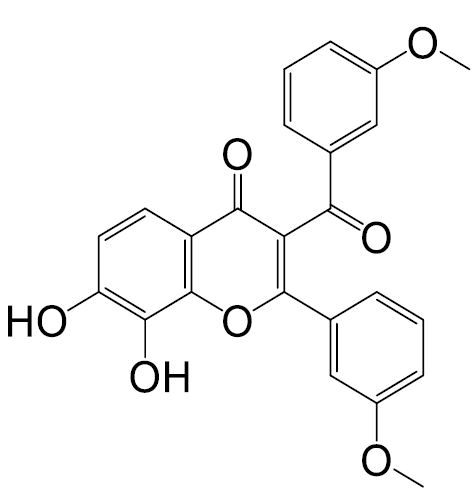  7,8-dihydroxy-3-(3-methoxybenzoyl)-2-(3-methoxyphenyl)chromen-4-one  C24H18O7  60165226 | 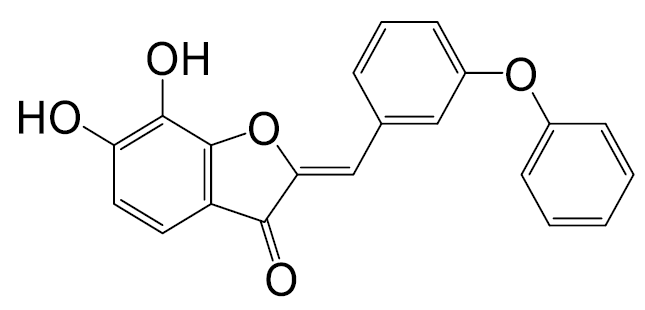  6,7-dihydroxy-2-[(3-phenoxyphenyl)methylidene]-1-benzofuran-3-one  C21H14O5  69838377 | 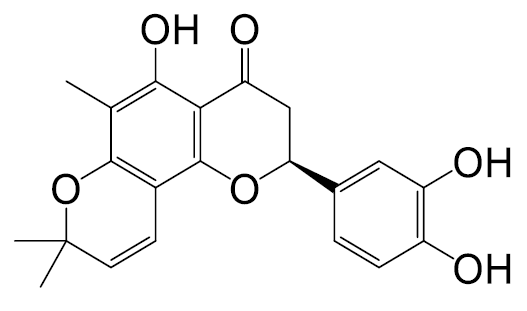  (2*S*)-2-(3,4-dihydroxyphenyl)-5-hydroxy-6,8,8-trimethyl-2,3-dihydropyrano[2,3-h]chromen-4-one  C21H20O6  71528833 | 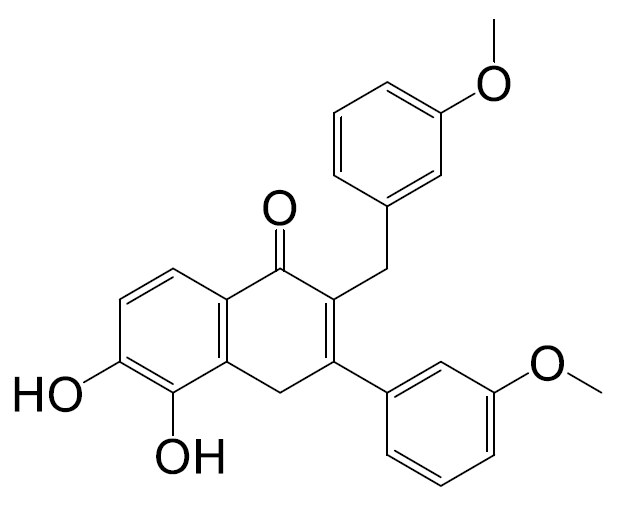  7,8-dihydroxy-2-(3-methoxyphenyl)-3-[(3-methoxyphenyl)methyl]chromen-4-one  C24H20O6  71592602 | 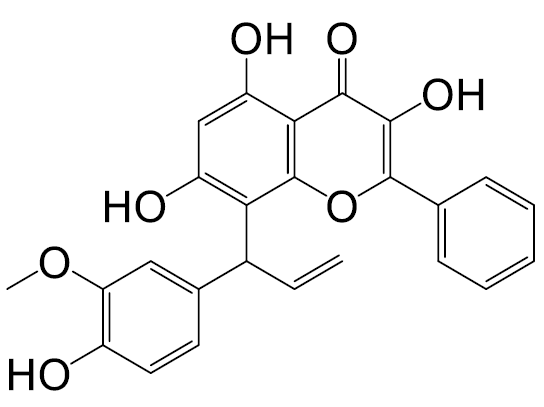  3,5,7-trihydroxy-8-[1-(4-hydroxy-3-methoxyphenyl)prop-2-enyl]-2-phenylchromen-4-one  C25H20O7  75149603 |
| --- | --- | --- | --- | --- | --- |
| 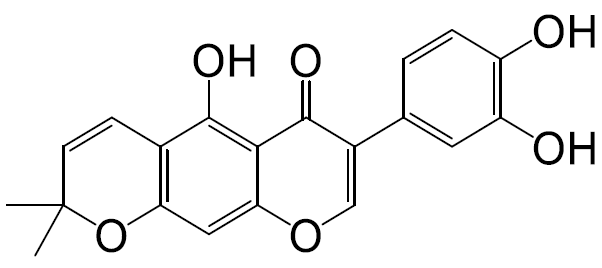  7-(3,4-dihydroxyphenyl)-5-hydroxy-2,2-dimethylpyrano[3,2-g]chromen-6-one  C20H16O6  76900284 | 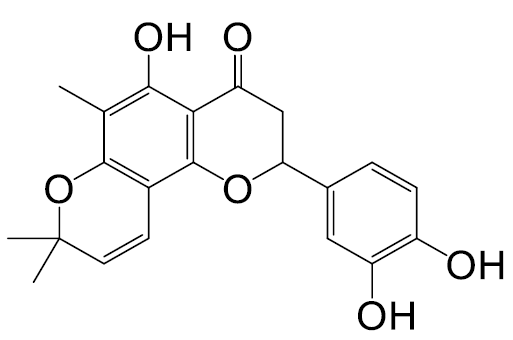  2-(3,4-dihydroxyphenyl)-5-hydroxy-6,8,8-trimethyl-2,3-dihydropyrano[2,3-h]chromen-4-one  C21H20O6  78099852 | 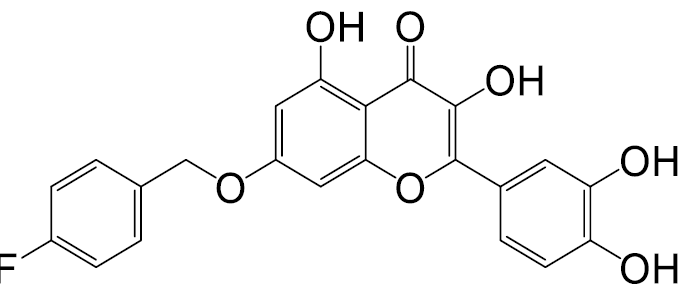  2-(3,4-dihydroxyphenyl)-7-[(4-fluorophenyl)methoxy]-3,5-dihydroxychromen-4-one  C22H15FO7  90643991 | 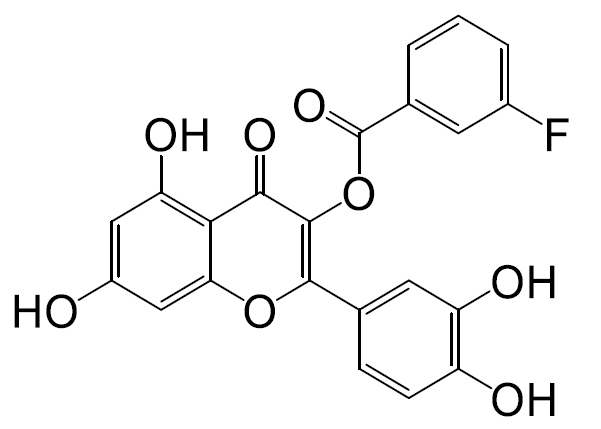  [2-(3,4-dihydroxyphenyl)-5,7-dihydroxy-4-oxochromen-3-yl] 3-fluorobenzoate  C22H13FO8  122230748 | 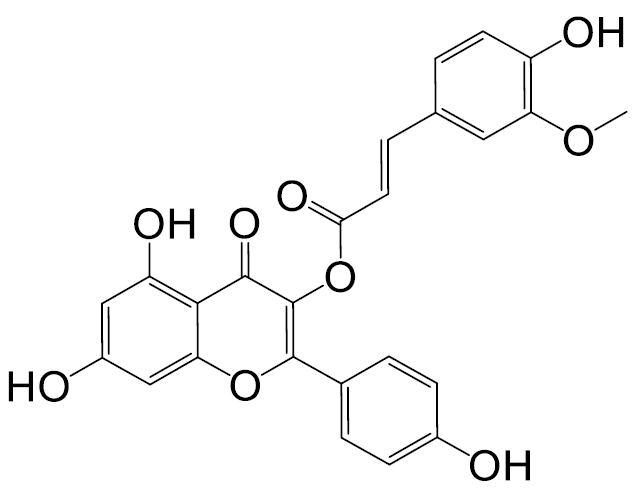  [5,7-dihydroxy-2-(4-hydroxyphenyl)-4-oxochromen-3-yl] 3-(4-hydroxy-3-methoxyphenyl)prop-2-enoate  C25H18O9  122421211 | 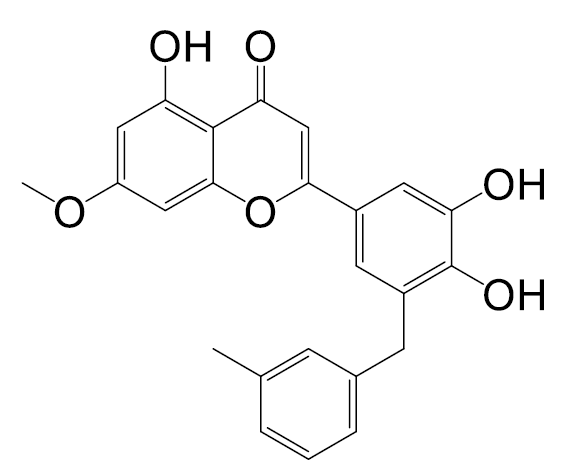  2-[3,4-dihydroxy-5-[(3-methylphenyl)methyl]phenyl]-5-hydroxy-7-methoxychromen-4-one  C24H20O6  127044660 |

Table S1 (continued) A list of 100 quercetin-like molecules with high docking score.

| 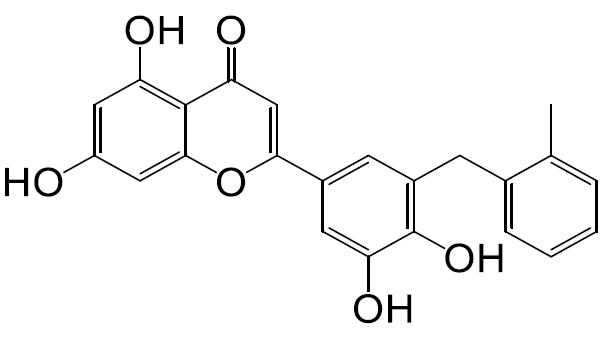  2-[3,4-dihydroxy-5-[(2-methylphenyl)methyl]phenyl]-5,7-dihydroxychromen-4-one  C23H18O6  127045149 | 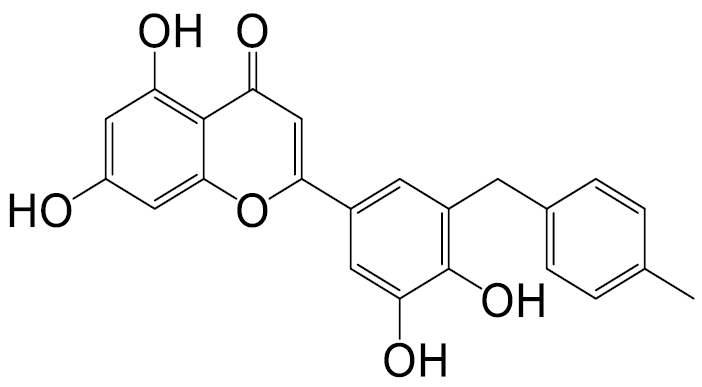  2-[3,4-dihydroxy-5-[(4-methylphenyl)methyl]phenyl]-5,7-dihydroxychromen-4-one  C23H18O6  127045295 | 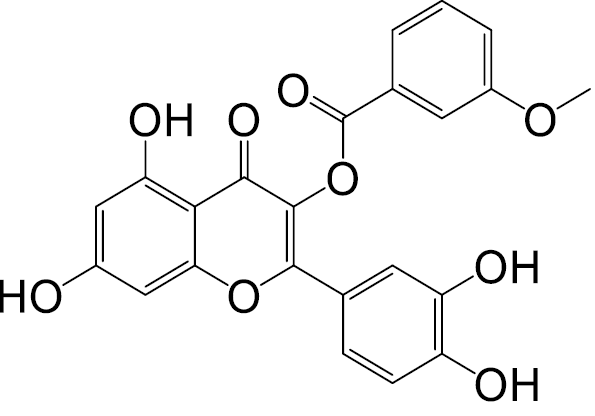  [2-(3,4-dihydroxyphenyl)-5,7-dihydroxy-4-oxochromen-3-yl] 3-methoxybenzoate  C23H16O9  129904780 | 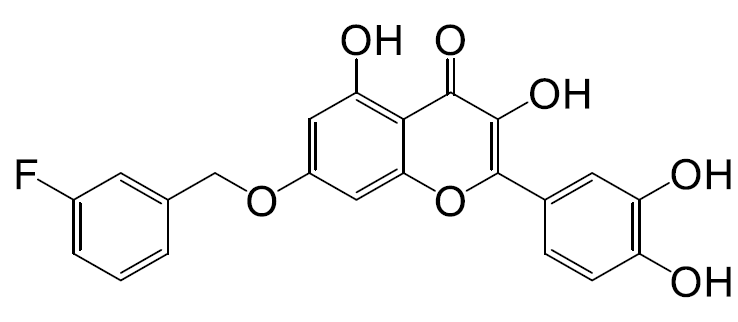  2-(3,4-dihydroxyphenyl)-7-[(3-fluorophenyl)methoxy]-3,5-dihydroxychromen-4-one  C22H15FO7  129904975 | 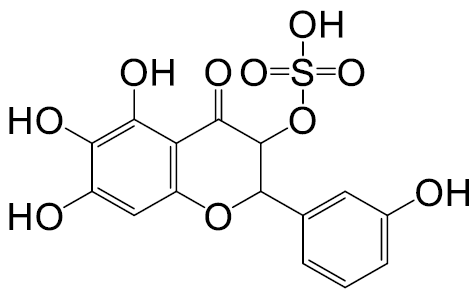  [5,6,7-trihydroxy-2-(3-hydroxyphenyl)-4-oxo-2,3-dihydrochromen-3-yl] hydrogen sulfate  C15H12O10S  131831857 | 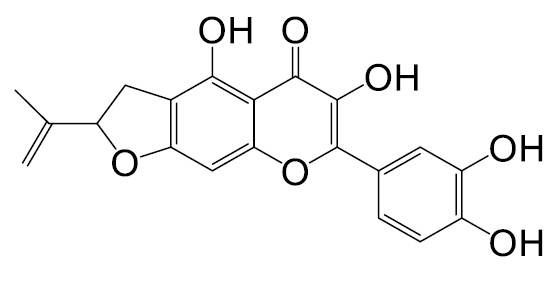  7-(3,4-dihydroxyphenyl)-4,6-dihydroxy-2-prop-1-en-2-yl-2,3-dihydrofuro[3,2-g]chromen-5-one  C20H16O7  442663 |
| --- | --- | --- | --- | --- | --- |
| 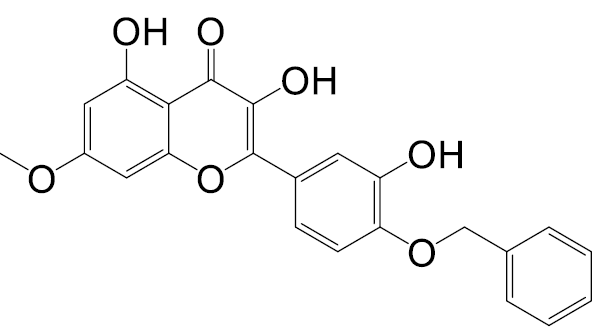  3,5-dihydroxy-2-(3-hydroxy-4-phenylmethoxyphenyl)-7-methoxychromen-4-one  C23H18O7  5704578 | 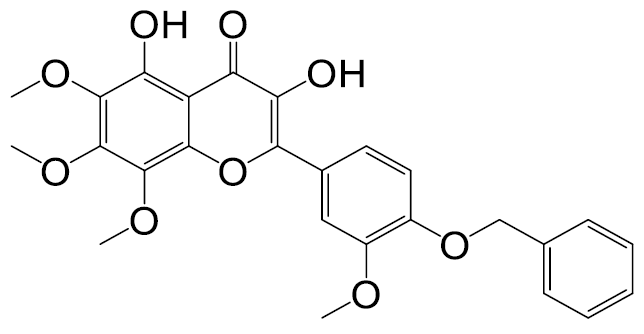  3,5-dihydroxy-6,7,8-trimethoxy-2-(3-methoxy-4-phenylmethoxyphenyl)chromen-4-one  C26H24O9  10528717 | 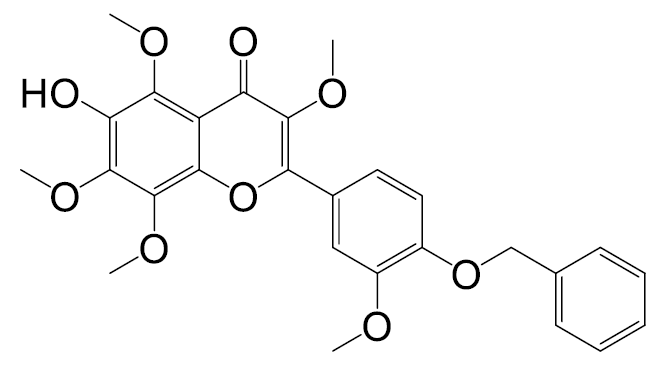  6-hydroxy-3,5,7,8-tetramethoxy-2-(3-methoxy-4-phenylmethoxyphenyl)chromen-4-one  C27H26O9  10529220 | 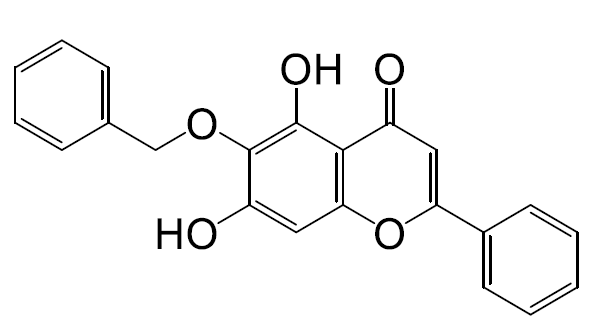  5,7-dihydroxy-2-phenyl-6-phenylmethoxychromen-4-one  C22H16O5  11314387 | 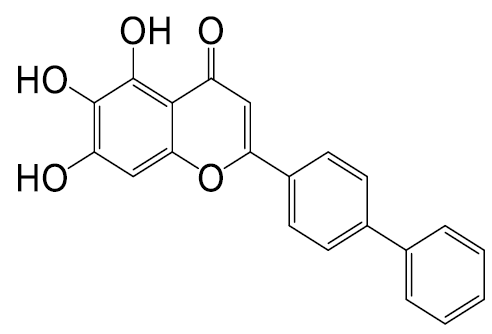  5,6,7-trihydroxy-2-(4-phenylphenyl)chromen-4-one  C21H14O5  11416700 | 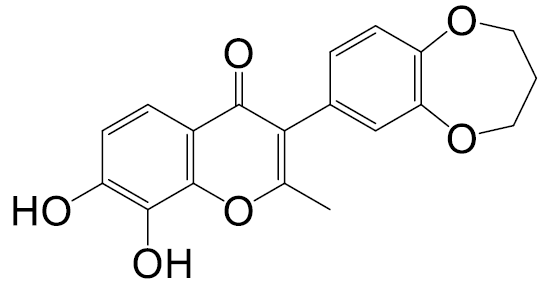  3-(3,4-dihydro-2*H*-1,5-benzodioxepin-7-yl)-7,8-dihydroxy-2-methylchromen-4-one  C19H16O6  15658884 |

Table S1 (continued) A list of 100 quercetin-like molecules with high docking score.

| 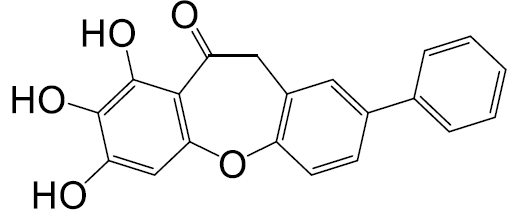  2,3,4-trihydroxy-8-phenyl-6*H*-benzo[b][1]benzoxepin-5-one  C20H14O5  20631776 | 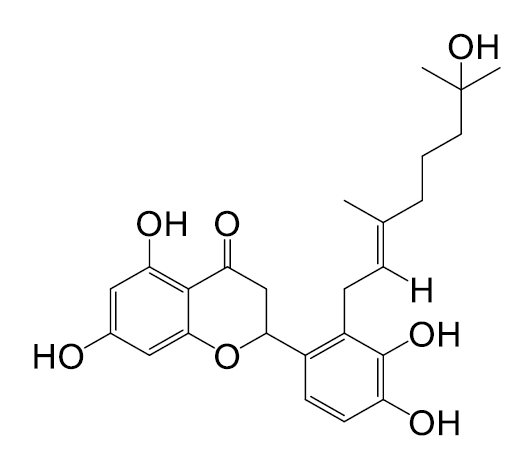  2-[3,4-dihydroxy-2-[(*E*)-7-hydroxy-3,7-dimethyloct-2-enyl]phenyl]-5,7-dihydroxy-2,3-dihydrochromen-4-one  C25H30O7  21629595 | 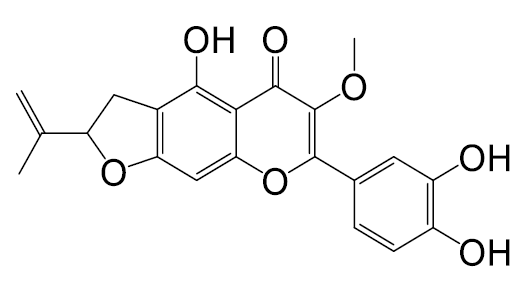  7-(3,4-dihydroxyphenyl)-4-hydroxy-6-methoxy-2-prop-1-en-2-yl-2,3-dihydrofuro[3,2-g]chromen-5-one  C21H18O7  44259674 | 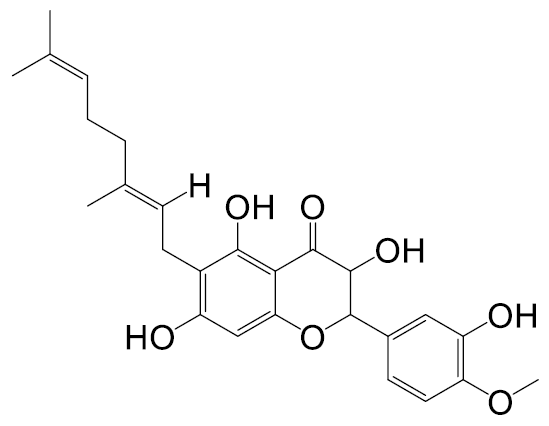  6-[(2E)-3,7-dimethylocta-2,6-dienyl]-3,5,7-trihydroxy-2-(3-hydroxy-4-methoxyphenyl)-2,3-dihydrochromen-4-one  C26H30O7  57520492 | 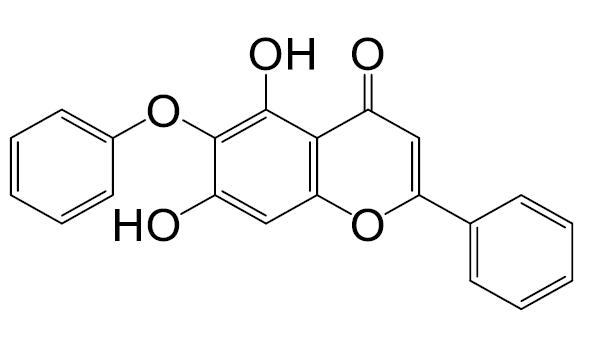  5,7-dihydroxy-6-phenoxy-2-phenylchromen-4-one  C21H14O5  66862728 | 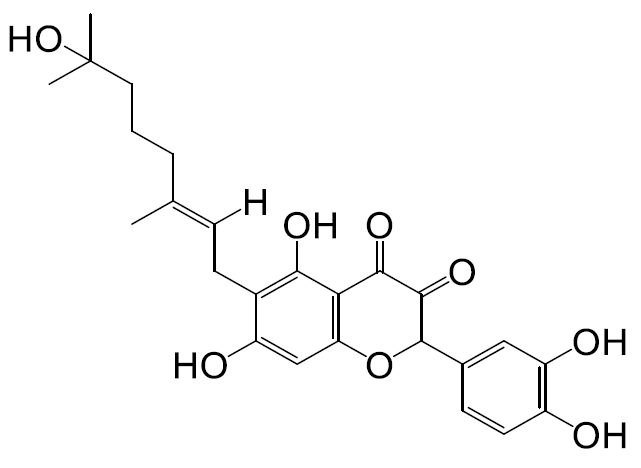  3-(3,4-dihydro-2*H*-1,5-benzodioxepin-7-yl)-7,8-dihydroxy-2-methylchromen-4-one  C19H16O6  15658884 |
| --- | --- | --- | --- | --- | --- |
| 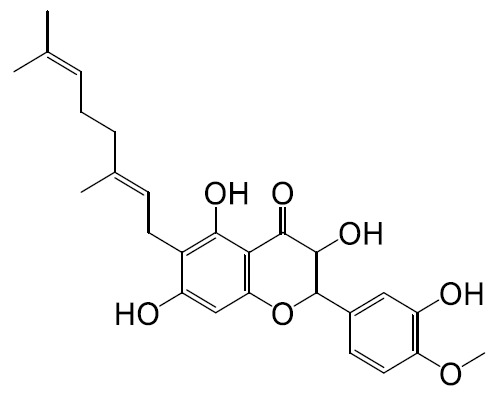  6-(3,7-dimethylocta-2,6-dienyl)-3,5,7-trihydroxy-2-(3-hydroxy-4-methoxyphenyl)-2,3-dihydrochromen-4-one  C26H30O7  74333957 | 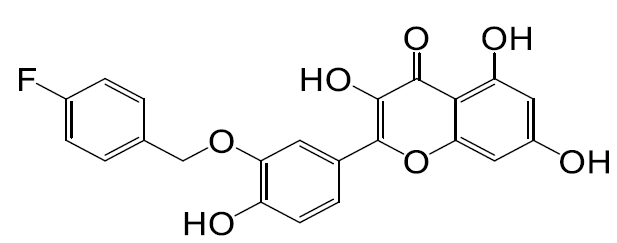  2-[3-[(4-Fluorophenyl)methoxy]-4-hydroxyphenyl]-3,5,7-trihydroxychromen-4-one  C22H15FO7  90643986 | 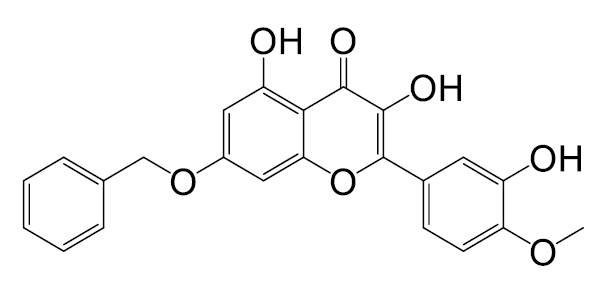  3,5-dihydroxy-2-(3-hydroxy-4-methoxyphenyl)-7-phenylmethoxychromen-4-one  C23H18O7  102595093 | 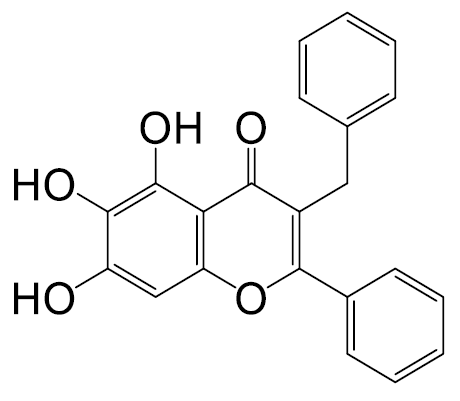  3-benzyl-5,6,7-trihydroxy-2-phenylchromen-4-one  C22H16O5  123375132 | 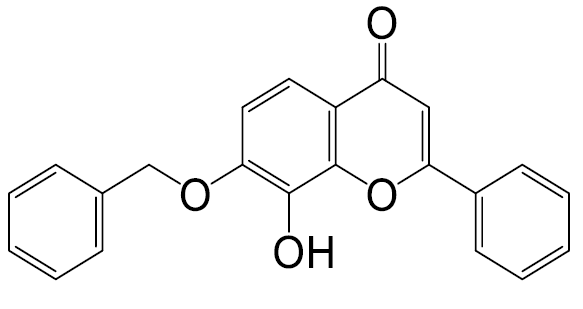  8-hydroxy-2-phenyl-7-phenylmethoxychromen-4-one  C22H16O4  129825136 | 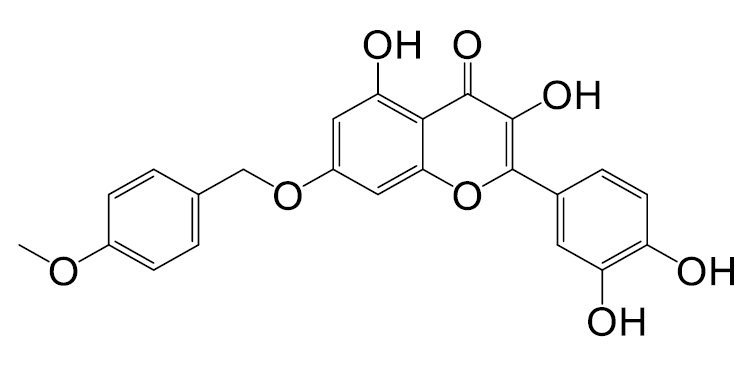  2-(3,4-dihydroxyphenyl)-3,5-dihydroxy-7-[(4-methoxyphenyl)methoxy]chromen-4-one  C23H18O8  129825762 |

Table S1 (continued) A list of 100 quercetin-like molecules with high docking score.

| 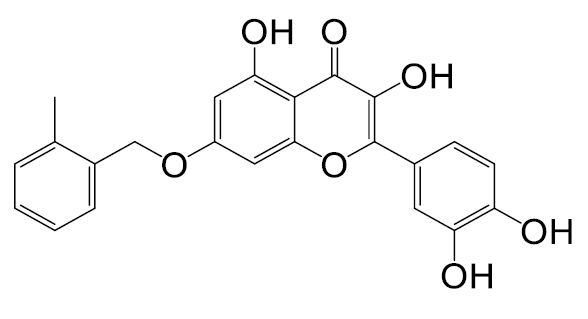  2-(3,4-dihydroxyphenyl)-3,5-dihydroxy-7-[(2-methylphenyl)methoxy]chromen-4-one  C23H18O7  129825788 | 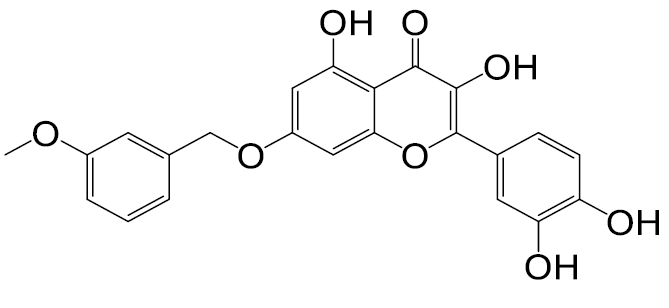  2-(3,4-dihydroxyphenyl)-3,5-dihydroxy-7-[(3-methoxyphenyl)methoxy]chromen-4-one  C23H18O8  129825797 | 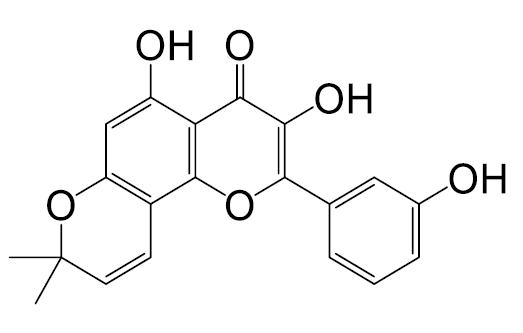  3,5-dihydroxy-2-(3-hydroxyphenyl)-8,8-dimethylpyrano[2,3-h]chromen-4-one  C20H16O6  131833748 | 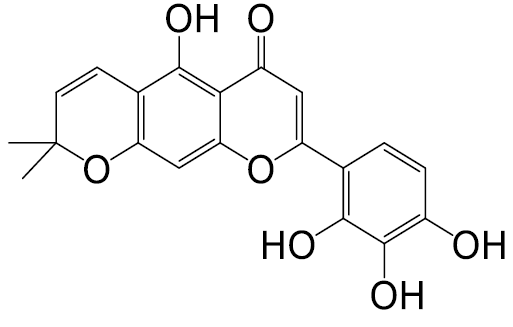  5-hydroxy-2,2-dimethyl-8-(2,3,4-trihydroxyphenyl)pyrano[3,2-g]chromen-6-one  C20H16O7  131833783 |  |  |
| --- | --- | --- | --- | --- | --- |

Table S2 A List of considered COMPs with pharmaceutical activity selected by Lipinski’s rule of five.

| **COMP** | **IUPAC name** | **Molecular formula** | **Molecular weight** | **#Atoms** | **logP** | **#HBD** | **#HBA** | **Chemical Structure** |
| --- | --- | --- | --- | --- | --- | --- | --- | --- |
| **1** | 5,7-dihydroxy-2-(4-hydroxy-3,5-dimethoxyphenyl)-3-phenylchromen-4-one | C23H18O7 | 406.3848 | 48 | 4.2610 | 3 | 7 |  |
| **2** | 3-(3,4-dihydroxyphenyl)-5-hydroxy-6-(2-hydroxy-3-methylbut-3-enyl)-8,8-dimethylpyrano[2,3-h]chromen-4-one | C25H24O7 | 436.4539 | 56 | 4.2405 | 4 | 7 |  |
| **3** | (4E)-3-(3,4-dihydroxyphenyl)-4-[(3,4-dihydroxyphenyl)methylidene]-8-hydroxy-2,3-dihydroxanthene-1,9-dione | C26H18O8 | 458.4163 | 52 | 4.2318 | 5 | 8 |  |
| **4** | (2S)-2-[3,4-dihydroxy-2-[(Z)-7-hydroxy-3,7-dimethyloct-2-enyl]phenyl]-5,7-dihydroxy-2,3-dihydrochromen-4-one | C25H30O7 | 442.5015 | 62 | 4.6455 | 5 | 7 |  |
| **5** | 7-cyclohexyl-3-hydroxy-2-(3,4,5-trihydroxyphenyl)chromen-4-one | C21H20O6 | 368.3799 | 47 | 4.3301 | 4 | 6 |  |

Table S2 (continued) A List of considered COMPs with pharmaceutical activity selected by Lipinski’s rule of five.

| **COMP** | **IUPAC name** | **Molecular formula** | **Molecular weight** | **#Atoms** | **logP** | **#HBD** | **#HBA** | **Chemical Structure** |
| --- | --- | --- | --- | --- | --- | --- | --- | --- |

| **6** | 3,5,7-trihydroxy-2-(8-hydroxy-2,2-dimethylchromen-6-yl)-8-(2-methylbut-3-en-2-yl)chromen-4-one | | | C25H24O7 | | 436.4539 | | 56 | | 4.9302 | | 4 | | 7 | |  | |
| --- | --- | --- | --- | --- | --- | --- | --- | --- | --- | --- | --- | --- | --- | --- | --- | --- | --- |
| **7** | | 5,6,7-trihydroxy-2,3-diphenylchromen-4-one | C21H14O5 | | 346.3329 | | 40 | | 4.2438 | | 3 | | 5 | |  | |
| **8** | | (3R)-6-[(2E)-3,7-dimethylocta-2,6-dienyl]-3,5,7-trihydroxy-2-(3-hydroxy-4-methoxyphenyl)-2,3-dihydrochromen-4-one | C26H30O7 | | 454.5122 | | 63 | | 4.7245 | | 4 | | 7 | |  | |
| **9** | | 1,3,4,8-tetrahydroxy-2,7-bis(3-methylbut-2-enyl)xanthen-9-one | C23H24O6 | | 396.4331 | | 53 | | 4.786 | | 4 | | 6 | |  | |
| **10** | | [4-(5,7-dihydroxy-4-oxochromen-2-yl)-2-hydroxyphenyl] hydrogen sulfate | C15H10O9S | | 366.2995 | | 35 | | 2.8392 | | 4 | | 9 | |  | |

Table S2 (continued) A List of considered COMPs with pharmaceutical activity selected by Lipinski’s rule of five.

| **COMP** | **IUPAC name** | **Molecular**  **formula** | **Molecular**  **weight** | **#Atoms** | **logP** | **#HBD** | **#HBA** | **Chemical Structure** |
| --- | --- | --- | --- | --- | --- | --- | --- | --- |
| **11** | 5-hydroxy-2-(8-hydroxy-2,2-dimethylchromen-6-yl)-7-methoxy-6,8-dimethylchromen-4-one | C23H22O6 | 394.4172 | 51 | 4.6808 | 2 | 6 |  |
| **12** | 3-hydroxy-2-phenyl-5-(3,4,5-trihydroxybenzoyl)chromen-4-one | C22H14O7 | 390.3424 | 43 | 3.5134 | 4 | 7 |  |
| **13** | 5-hydroxy-2,2-dimethyl-8-[2,4,5-trihydroxy-3-(3-methylbut-2-enyl)phenyl]pyrano[3,2-g]chromen-6-one | C25H24O7 | 436.4539 | 56 | 4.9753 | 4 | 7 |  |
| **14** | 2-[3,4-dihydroxy-5-[(E)-6-hydroxy-3,6-dimethylhept-2-enyl]phenyl]-5,7-dihydroxy-2,3-dihydrochromen-4-one | C24H28O7 | 428.4749 | 59 | 4.2554 | 5 | 7 |  |
| **15** | (2S)-2-[3,4-dihydroxy-5-[(Z)-7-hydroxy-3,7-dimethyloct-2-enyl]phenyl]-5,7-dihydroxy-2,3-dihydrochromen-4-one | C25H30O7 | 442.5015 | 62 | 4.6455 | 3 | 7 |  |
| quercetin | 2-(3,4-dihydroxyphenyl)-3,5,7-trihydroxychromen-4-one | C15H10O7 | 302.2357 | 32 | 1.988 | 5 | 7 |  |

**Figure S1**

Comparison of ** desity of obatained structural information from 40 ns MD simulation of fPrP170-229 decamers from three independent replicas in explicit solvent model or in implicit solvent model, respectively. Yellow squares represent ** from residues of fPrP170-229.

**Figure S2**

Docking pose of COMPs **1**-**5** with fPrP170-229. The binding cavity is shown in an enlarged frame.

**Figure S3**

The interaction network of COMPs **1-5** with fPrP170-229. The alphabets in the parentheses represent fibril chains in which the corresponding residues locate. The backbone of quercetin is shown in purple. The residues playing the role of hydrogen bond donors are labeled in green. The residues interacting with quercetin through van der Waals interaction are labeled in black with red spoked arcs.

**Figure S4**

The final structures of COMP-fPrP170-229 complexes after 162 ns MD simulation.

**Figure S5**

RMSD of fPrP170-229 backbone. (**A**) COMP **1** model A-C, (**B**) COMP **2** model A-C, (**C**) COMP **3** model A-C, (**D**) COMP **4** model A-C, and (**E**) COMP **5** model A-C.

**Figure S6**

Binding energy of COMP **1**-**5** with fibril in MM/GBSA model.

**Figure S7**

RMSF of COMP-fPrP170-229 complexes.

**Figure S8**

The secondary structure of treated fPrP170-229 from the last 20 ns trajectory.

**Figure S9**

The alignment of fPrP170-229 and 263K PrPSc from residue 170 to 227. The fPrP170-229, 263K PrPSc and two glycosylation sites are label with blue, green, black, and red, respectively.

**Figure S10**

The structure of mutated PrP E196K fPrP175-217. (A) fPrP175-217 structure, (B) the alignment of fPrP170-229 and fPrP175-217. The fPrP170-229 and fPrP175-217 are label with blue and green, respectively.
